# Supplementary material for: Heteroatom P filling activates intrinsic S atomic sites of few-layered ZnIn2S4via modulation of H adsorption kinetics for sacrificial agent-free photocatalytic hydrogen evolution from pure water and seawater
Source: Royal Society of Chemistry journal article supplement (doi:10.1039/d2ta08789h), 2023-01-01
Supplement: d2ta08789h1.pdf [file d2ta08789h1.pdf]

Supporting Information

**Heteroatom P filling activates intrinsic S atomic sites of few-layered ZnIn<sub>2</sub>S<sub>4</sub> via modulation of H adsorption kinetics for sacrificial-free photocatalytic hydrogen evolution from pure water and seawater**

Boon-Junn Ng,<sup>a</sup> Wei-Kean Chong,<sup>a</sup> Lutfi Kurnianditia Putri,<sup>a</sup> Xin Ying Kong,<sup>b</sup> Jingxiang Low,<sup>a,c</sup> Hing Wah Lee,<sup>d</sup> Lling-Lling Tan,<sup>a</sup> Wei Sea Chang,<sup>e</sup> Siang-Piao Chai<sup>a,\*</sup>

**Table S1.** Composition of the artificial seawater.

| Element   | Amount (mg/L) | Element    | Amount (mg/L) |
|-----------|---------------|------------|---------------|
| Chloride  | 19230         | Silicon    | < 0.05        |
| Sodium    | 10610         | Iron       | 0.012         |
| Sulfate   | 2485          | Copper     | 0.0003        |
| Magnesium | 1390          | Nickel     | < 0.015       |
| Potassium | 398           | Zinc       | 0.008         |
| Calcium   | 409           | Manganese  | 0.01          |
| Carbonate | 179           | Molybdenum | 0.01          |
| Strontium | 10            | Cobalt     | 0.0004        |
| Boron     | 7.6           | Vanadium   | < 0.015       |
| Bromide   | 20            | Selenium   | < 0.019       |
| Iodide    | 0.05          | Rubidium   | 0.115         |
| Lithium   | 0.26          | Barium     | < 0.05        |

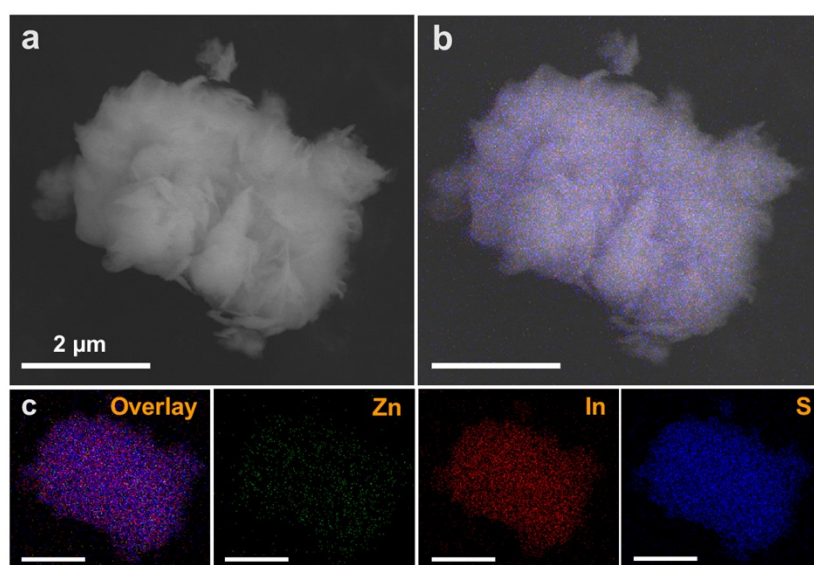

**Fig. S1 Morphology and composition of pristine ZIS.** (a) FESEM image and corresponding (b) false colored and (c) EDX elemental mapping of pristine ZIS (scale bar: 2 μm).

**Table S2.** Analytical data of energy-dispersive X-ray (EDX) spectroscopy of the P-doped samples.

| Entry | Sample   | P Atomic Percentage (at %) |
|-------|----------|----------------------------|
| 1     | ZIS-P100 | 3.08                       |
| 2     | ZIS-P200 | 6.97                       |
| 3     | ZIS-P300 | 10.89                      |

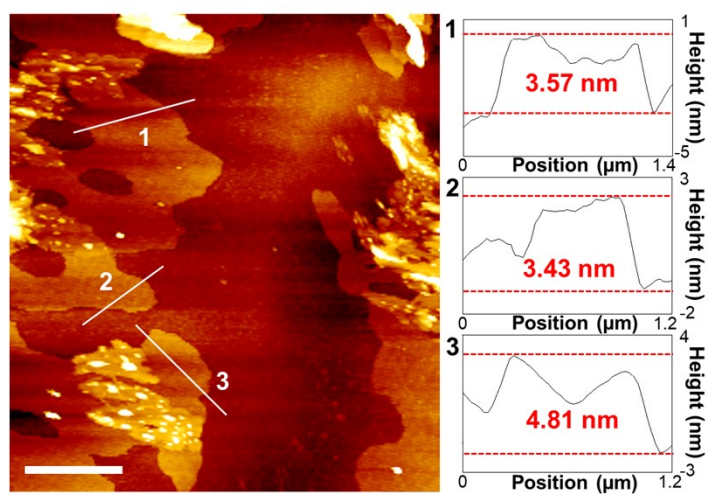

**Fig. S2 AFM analysis.** AFM image and corresponding height profile of ZIS (scale bar: 1  $\mu\text{m}$ ).

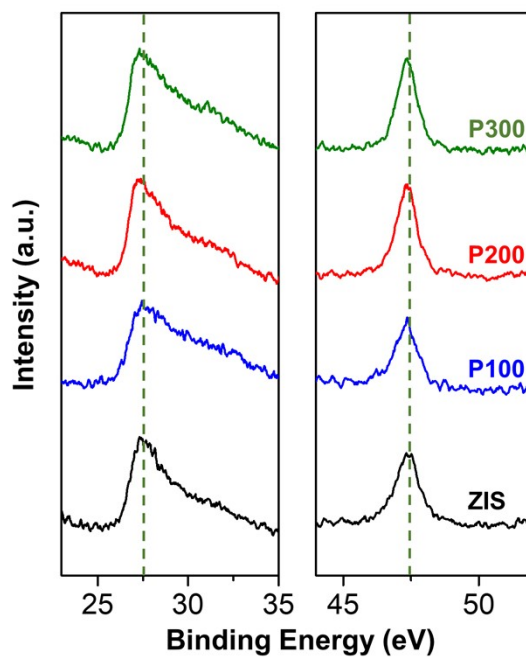

**Fig. S3 XRD analysis.** Enlarged XRD peaks showing (102) and (110) crystal planes of the respective samples.

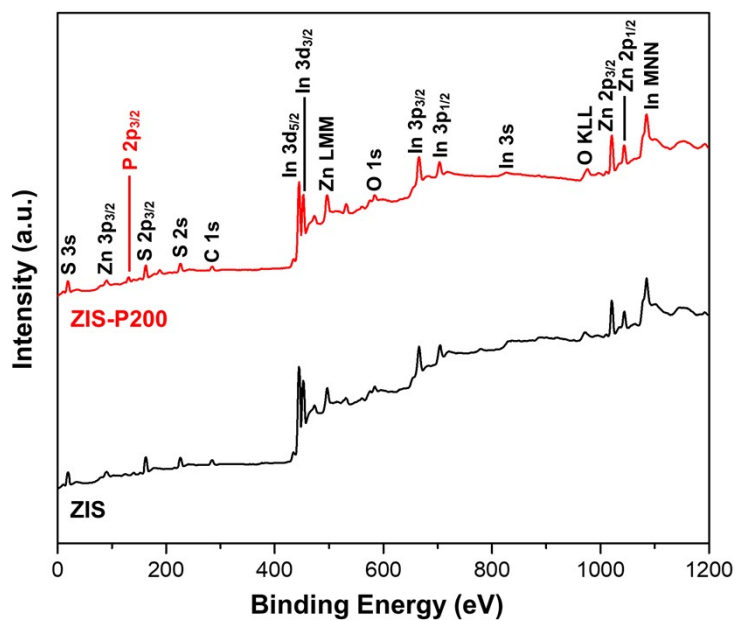

**Fig. S4 XPS analysis.** Full XPS spectra of ZIS and ZIS-P200.

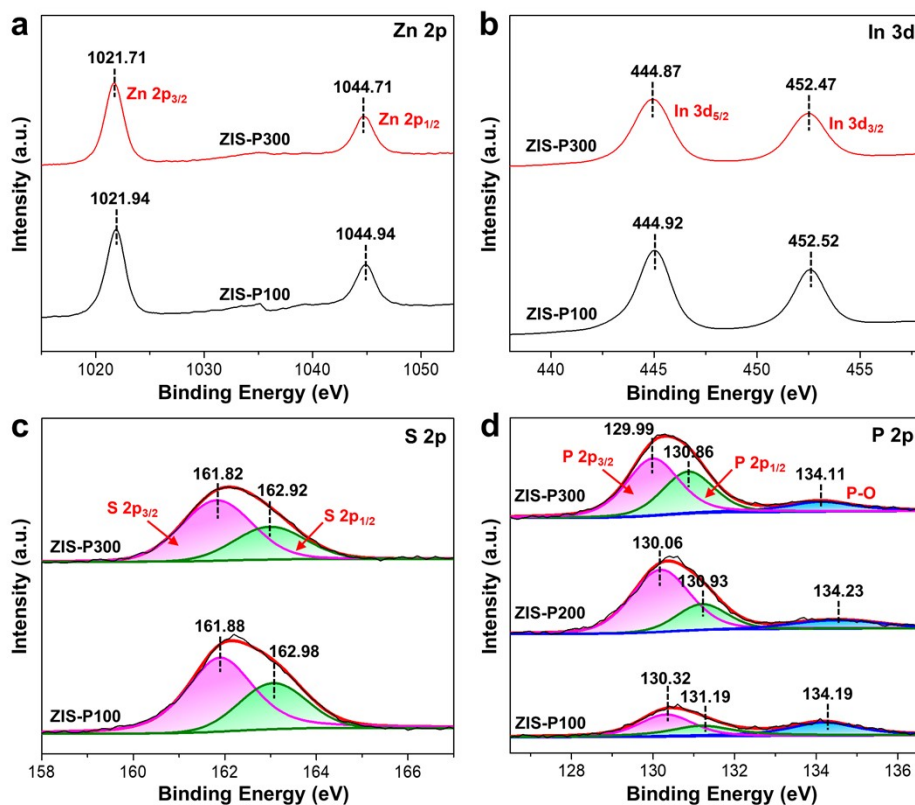

**Fig. S5 XPS analysis on the effect of P content.** (a) Zn 2p, (b) In 3d and (c) S 2p XPS spectra of ZIS-P100 and ZIS-P300. (d) P 2p XPS spectra of ZIS-P100, ZIS-P200 and ZIS-P300.

**Table S3.** Relative atomic ratio of ZIS and ZIS-P200 measured by XPS.

| Entry | Sample   | Atomic Ratio (Normalized to Zn = 1) |      |      |
|-------|----------|-------------------------------------|------|------|
|       |          | Zn                                  | In   | S    |
| 1     | ZIS      | 1                                   | 2.13 | 3.94 |
| 2     | ZIS-P200 | 1                                   | 2.19 | 3.30 |

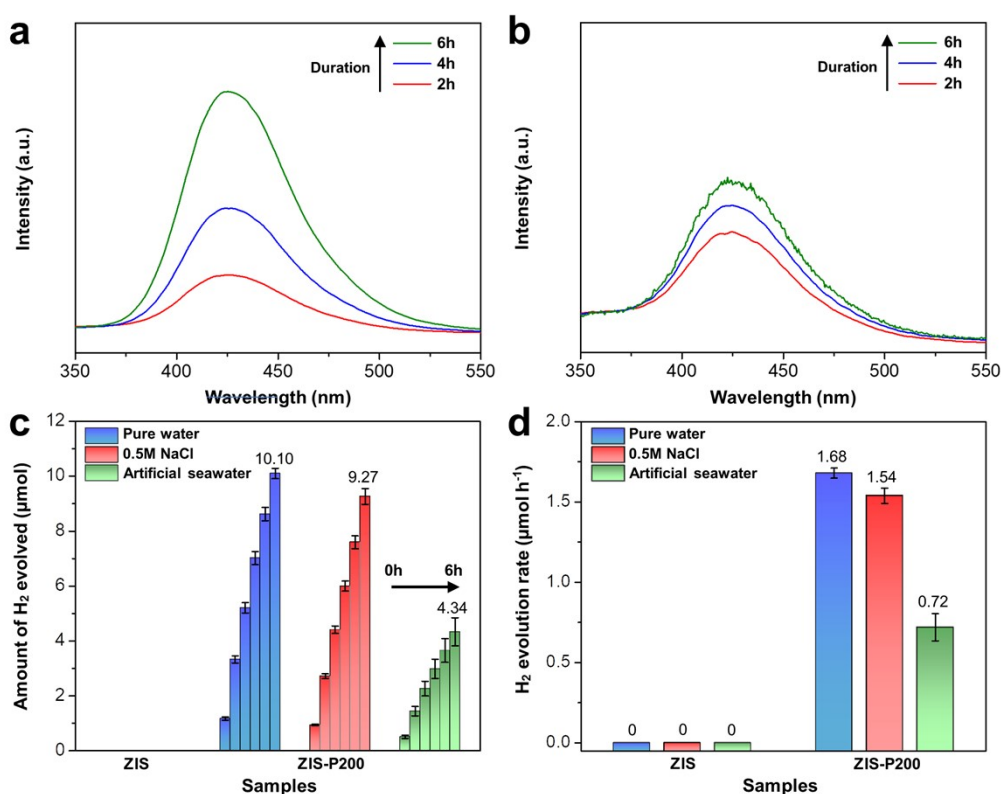

**Fig. S6 Photocatalytic performance on pure water and seawater splitting.** Time dependence of  $\cdot\text{OH}$  trapping PL spectra for ZIS-P200 in (a) pure water and (b) 0.5 M NaCl under visible light irradiation. (c) Time courses of  $\text{H}_2$  evolution and (d) corresponding  $\text{H}_2$  yield of ZIS and ZIS-P200 in pure water, 0.5 M NaCl and artificial seawater under visible light irradiation.

**Table S4.** Comparison of photocatalytic HER performance from pure water and simulated seawater for single-component photocatalysts.

| Photocatalyst                         | Co-catalyst | Reaction Condition                                                   | Performance                                                       | Ref.      |
|---------------------------------------|-------------|----------------------------------------------------------------------|-------------------------------------------------------------------|-----------|
| ZIS-P200                              | -           | DI water (60 mL);<br>350 W Xe lamp<br>( $\lambda > 400 \text{ nm}$ ) | $\text{H}_2$ : $1.68 \mu\text{mol h}^{-1}$<br>AQY: 0.16% (420 nm) | This work |
| Ni-doped<br>$\text{ZnIn}_2\text{S}_4$ | -           | DI water (45 mL);<br>300 W Xe lamp<br>(AM 1.5)                       | $\text{H}_2$ : $0.86 \mu\text{mol h}^{-1}$                        | [S1]      |

|                                                                    |                          |                                                                                                                             |                                                                   |              |
|--------------------------------------------------------------------|--------------------------|-----------------------------------------------------------------------------------------------------------------------------|-------------------------------------------------------------------|--------------|
| P-doped<br>$\text{Zn}_{0.5}\text{Cd}_{0.5}\text{S}_{1-x}$          | -                        | DI water (120 mL);<br>500 W Xe lamp<br>( $\lambda > 400$ nm)                                                                | $\text{H}_2$ : 0.97 $\mu\text{mol h}^{-1}$<br>AQY: 0.15% (420 nm) | [S2]         |
| CdS                                                                | CoP and<br>$\text{WS}_2$ | DI water (100 mL);<br>300 W Xe lamp<br>( $\lambda > 420$ nm)                                                                | $\text{H}_2$ : 0.46 $\mu\text{mol h}^{-1}$                        | [S3]         |
| P-doped CdS                                                        | CoP                      | DI water (20 mL);<br>$3 \times 30$ W LED lamp<br>( $\lambda > 420$ nm)                                                      | $\text{H}_2$ : 1.16 $\mu\text{mol h}^{-1}$                        | [S4]         |
| ZIS-P200                                                           | -                        | 0.5 M NaCl (60 mL);<br>350 W Xe lamp<br>( $\lambda > 400$ nm)                                                               | $\text{H}_2$ : 1.54 $\mu\text{mol h}^{-1}$                        | This<br>work |
| $\text{WO}_2$ -<br>$\text{Na}_x\text{WO}_3$<br>hybrid<br>conductor | -                        | 0.2 M phosphate-<br>buffered saline<br>(pH = 6) (10 mL);<br>1000 W Xe lamp<br>(Full spectrum)                               | $\text{H}_2$ : $\sim 0.20$ $\mu\text{mol h}^{-1}$                 | [S5]         |
| Nano $\text{TiO}_2$                                                | CuO                      | 3.5% NaCl (45 mL);<br>300 W Xe lamp<br>(Full spectrum)                                                                      | $\text{H}_2$ : 0.31 $\mu\text{mol h}^{-1}$                        | [S6]         |
| ZIS-P200                                                           | Ru                       | 0.5 M NaCl (60 mL);<br>350 W Xe lamp<br>( $\lambda > 400$ nm)                                                               | $\text{H}_2$ : 3.43 $\mu\text{mol h}^{-1}$                        | This<br>work |
| CdS                                                                | CoS                      | 0.55 M NaCl with<br>0.2 M $\text{Na}_2\text{S}/\text{Na}_2\text{SO}_3$<br>(6 mL);<br>Visible light<br>( $\lambda > 420$ nm) | $\text{H}_2$ : 1.43 $\mu\text{mol h}^{-1}$                        | [S7]         |

---

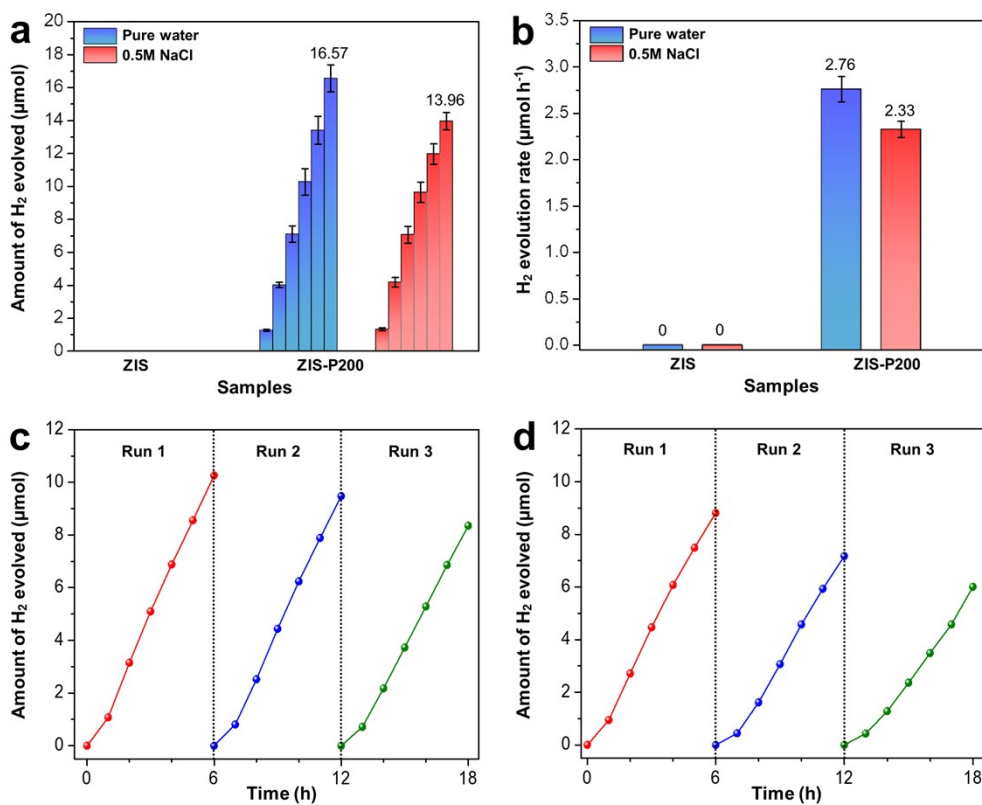

**Fig. S7 Photocatalytic performance under full spectrum irradiation.** (a) Time courses of H<sub>2</sub> evolution and (b) corresponding H<sub>2</sub> yield of ZIS and ZIS-P200 in pure water and 0.5 M NaCl under full spectrum irradiation. Recycling runs of photocatalytic H<sub>2</sub> evolution for ZIS-P200 in (c) pure water and (d) 0.5 M NaCl under visible light irradiation.



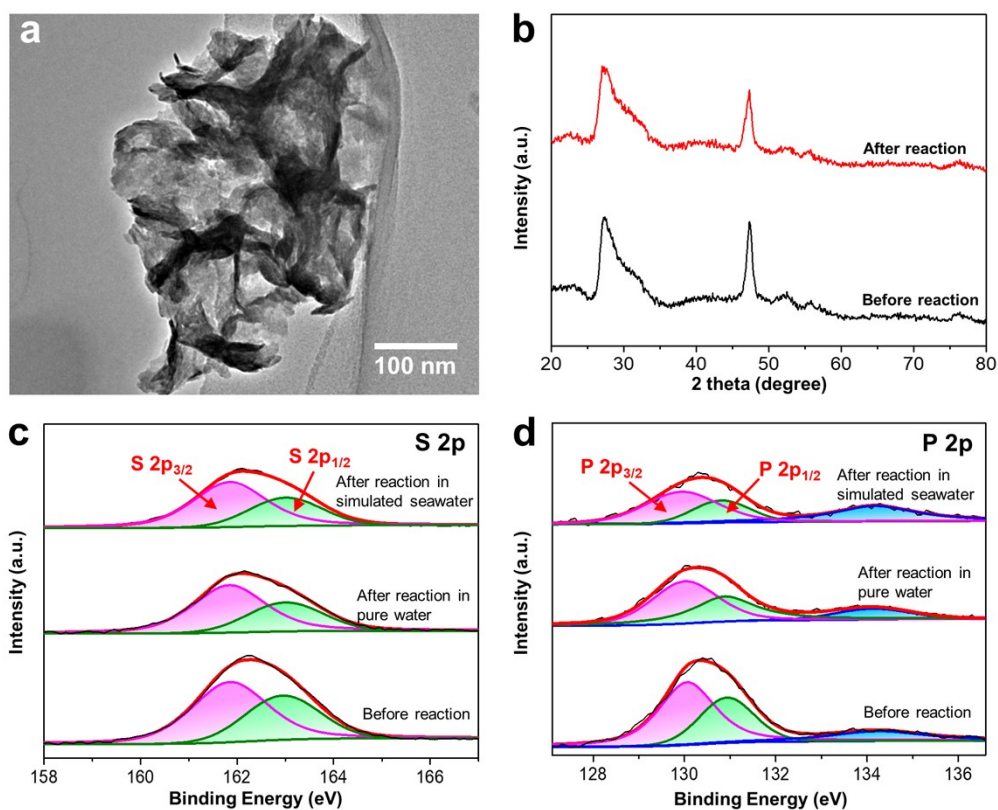

**Fig. S8 Photocatalytic stability analysis.** (a) Representative TEM image of ZIS-P200 after three repeated photocatalytic cycles in pure water. (b) XRD patterns, (c) S 2p and (d) P 2p XPS spectra of ZIS-P200 before and after three repeated photocatalytic cycles in pure water and simulated seawater.

**Table S5.** Relative atomic ratio of ZIS-P200 before and after three repeated photocatalytic cycles in pure water and simulated seawater measured by XPS.

| Sample                               | Atomic Ratio (Normalized to Zn = 1) |      |      |      |
|--------------------------------------|-------------------------------------|------|------|------|
|                                      | Zn                                  | In   | S    | P    |
| Before reaction                      | 1                                   | 2.19 | 3.30 | 0.50 |
| After reaction in pure water         | 1                                   | 2.07 | 3.06 | 0.47 |
| After reaction in simulated seawater | 1                                   | 2.00 | 2.96 | 0.43 |

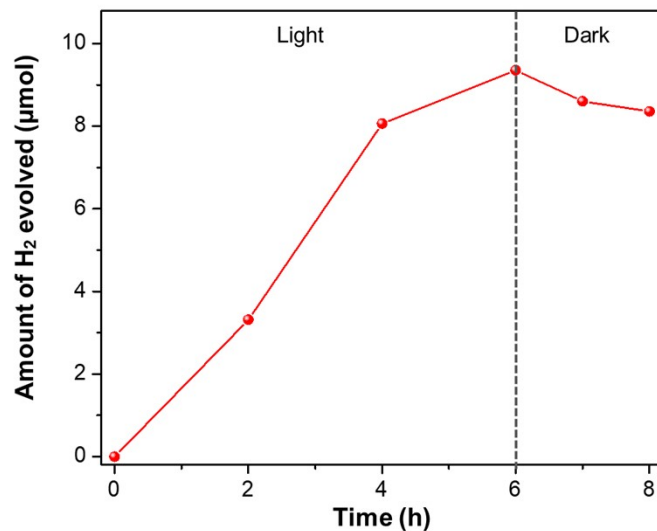

**Fig. S9 Backward reaction testing.** Time courses of H<sub>2</sub> evolution of ZIS-P200 in pure water under visible light irradiation and dark condition.

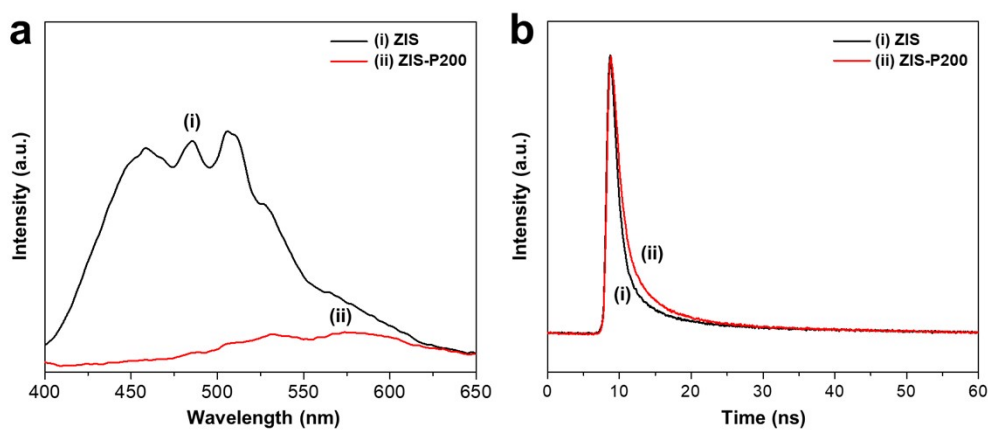

**Fig. S10 Photoluminescence analysis.** (a) Steady-state PL spectra and (b) time-resolved PL decay curves of (i) ZIS and (ii) ZIS-P200.

## References

- [S1] Shi, X.; Mao, L.; Dai, C.; Yang, P.; Zhang, J.; Dong, F.; Zheng, L.; Fujitsuka, M.; Zheng, H., Inert basal plane activation of two-dimensional ZnIn<sub>2</sub>S<sub>4</sub> via Ni atom doping for enhanced co-catalyst free photocatalytic hydrogen evolution. *J. Mater. Chem. A* **2020**, *8* (26), 13376-13384.
- [S2] Ng, B.-J.; Putri, L. K.; Kong, X. Y.; Pasbakhsh, P.; Chai, S.-P., Overall pure water splitting using one-dimensional P-doped twinned Zn<sub>0.5</sub>Cd<sub>0.5</sub>S<sub>1-x</sub> nanorods via synergetic combination of long-range ordered homojunctions and interstitial S vacancies with prolonged carrier lifetime. *Appl. Catal. B* **2020**, *262*, 118309.
- [S3] Zhong, Y.; Wu, Y.; Chang, B.; Ai, Z.; Zhang, K.; Shao, Y.; Zhang, L.; Hao, X., A CoP/CdS/WS<sub>2</sub> p-n-n tandem heterostructure: a novel photocatalyst for hydrogen evolution without using sacrificial agents. *J. Mater. Chem. A* **2019**, *7* (24), 14638-14645.
- [S4] Shi, R.; Ye, H.-F.; Liang, F.; Wang, Z.; Li, K.; Weng, Y.; Lin, Z.; Fu, W.-F.; Che, C.-M.; Chen, Y., Interstitial P-doped CdS with long-lived photogenerated electrons for photocatalytic water splitting without sacrificial agents. *Adv. Mater.* **2018**, *30*, 1705941.
- [S5] Cui, G.; Wang, W.; Ma, M.; Xie, J.; Shi, X.; Deng, N.; Xin, J.; Tang, B., IR-driven photocatalytic water splitting with WO<sub>2</sub>-Na<sub>x</sub>WO<sub>3</sub> hybrid conductor material. *Nano Lett.* **2015**, *15* (11), 7199-7203.
- [S6] Simamora, A. J.; Hsiung, T. L.; Chang, F. C.; Yang, T. C.; Liao, C. Y.; Wang, H. P., Photocatalytic splitting of seawater and degradation of methylene blue on CuO/nano TiO<sub>2</sub>. *Int. J. Hydrogen Energy* **2012**, *37* (18), 13855-13858.
- [S7] Liu, S.; Ma, Y.; Chi, D.; Sun, Y.; Chen, Q.; Zhang, J.; He, Z.; He, L.; Zhang, K.; Liu, B., Hollow heterostructure CoS/CdS photocatalysts with enhanced charge transfer for photocatalytic hydrogen production from seawater. *Int. J. Hydrogen Energy* **2022**, *47* (15), 9220-9229.
